# Supplementary material for: Posterior–Anterior Brain Maturation Reflected in Perceptual, Motor and Cognitive Performance
Source: PubMed Central journal article supplement (PMC5411422; doi:10.3389/fpsyg.2017.00674), 2017-05-02
Supplement: Data_Sheet_1.pdf [file Data_Sheet_1.pdf]

## 1 **Supplementary material**

2 The use of linear regression for modelling developmental features is somewhat misleading, as  
3 most if not all developmental features are constrained between a minimum value, where the  
4 feature observed is in an undeveloped stage, and a maximum value, that can be considered as a  
5 fully developed stage. In our case the interval of development between the undeveloped and  
6 developed features are bigger than the variation that can be found in any single age cohort  
7 observed. Since our independent variable is age, the chosen modelling scheme must reflect  
8 some properties of development as a general process as a function of time. Development, as a  
9 process, starts from a baseline value that can be interpreted as the missing developmental  
10 feature, or as the basis on which the development occurs. This baseline capability then begins  
11 to increase due to the developmental process, and reaches a maximum acceleration (the  
12 inflection point of the curve). This signifies the point when the development is the fastest and  
13 most prominent. Then, the developmental process slows down due to the saturation of the  
14 biological capabilities and maturing program, and when reaches the developmental limit, it  
15 stays at a high level constantly. The best suited fitting curve that answers this purpose is the  
16 sigmoid curve. Several other studies used one or the other from this family of curves for human  
17 developmental modelling. A study by Jando and colleagues (2012) demonstrated the  
18 experience-dependence with the use of sigmoid fitting: preterm infants developed binocular  
19 vision, earlier, when age was adjusted to conception, but curves overlapped, when postnatal age  
20 was considered. Accelerated maturation of white matter was observed in young children with  
21 autistic spectrum disorder using log-sigmoid model-fitting (Ben Bashat et al., 2007). Dean and  
22 colleagues (2014) modeled healthy male myelination between 3 and 60 months applying a  
23 slightly modified version of the log-sigmoid curve. Note that a similar set of authors published  
24 a study where they modelled such data with a log curve (Deoni et al., 2012). However, a log  
25 curve is very similar to the sigmoid curve after correct parameterization of its inflection point,

26 and the log sigmoid curve has more theoretical basis, especially when interpreting data related  
27 to a function that more or less saturates to a level in early adulthood. Therefore, we limit the  
28 non-linear fitting to these types of curves. There are more considerations to further limit these  
29 curves and their parameters. Generally, the fitted curves have to reflect some acceptable  
30 developmental process: firstly, the flat baseline of the curves should occur at an interpretable  
31 distance from the biological beginning of life; secondly, for the same feature fitted for boys’  
32 and girls’ data, the baseline should be at the same level as the theoretical null point of  
33 development. As for the first constraint, being too strict would be false, for the developmental  
34 process is much more complex than any sigmoid curve could suggest, and development might  
35 speed up, or slow down at different ages more than reflected in such a model. However,  
36 strictness is favourable in the case of the second feature because the dependent variable is  
37 common in the two genders.

38 As a fitting method we used the Curve Fitting Toolbox of MatLab (2014b). The six databases  
39 were transformed so that their zero value has a meaning of the entire developmental function  
40 baseline, thus enabling us omitting one parameter to vary freely (see Figure 2). We fitted data  
41 using the Curve Fitting Toolbox of MatLab (2014b) with the equation of

$$42 \quad \textit{predictedFunctionLevel} = 0 + \frac{\textit{saturationLevel}}{1 + e^{\frac{\textit{inflexionPoint} - \textit{age}}{\textit{developmentSpeed}}}}$$

43 Different fittings were calculated for females and males, and after the fitting process, we  
44 transformed the data and the fitted curves in a way that different saturation levels of males and  
45 females were filtered out, their respective saturation levels transformed to 1. Thus, we  
46 eliminated gender performance differences to concentrate purely on the developmental process  
47 dynamics of the two genders. This latter transformation does not affect the inflection points  
48 reported.

49 Note that using nonlinear models often enhances model accuracy. Considering linear regression  
50 as the “smart” baseline model, there are multiple choices from a range of fitting methods and

51 algorithms. Since there are multiple non-linear fitting methods available, trying multiple  
 52 models, and finding one that is better than the “smart” baseline, is almost evident, that is, if not  
 53 theoretically underpinned, raises a problem similar to inflated Error Type I. Therefore, we  
 54 limited ourselves to a single non-linear model that is theoretically most suitable to fit our data,  
 55 furthermore we fixed one parameter of the sigmoid curve so that it reflects a developmental  
 56 starting point.

57 When compared to linear models, the sigmoid models perform better, in each case producing  
 58 higher  $R^2$  values on the datasets. Using F statistics, and Akaike Information Criterion (AIC) to  
 59 compare the models with respect to the different degrees of freedom, we can still observe  
 60 slightly better fitting with the sigmoid curves than by using linear regression, except for two  
 61 cases (see Table S1). In general, the sigmoid curve fits better the data, even considering the  
 62 shrinking in the degrees of freedom. More importantly, the linear model has no theoretical basis:  
 63 the two parameters vary freely, with uninterpretable predictions for the populations before and  
 64 after the cohorts are measured.

65 Table S1 Linear and Sigmoid model comparison

66

|                            |        | Unadjusted $R^2$ |        | model parameters |         |    | F-statistics |       | AIC   |
|----------------------------|--------|------------------|--------|------------------|---------|----|--------------|-------|-------|
|                            |        | sigmoid          | linear | df-sig.          | df-lin. | N  | F            | p     | d-AIC |
| <b>Contour Integration</b> | female | 0.373            | 0.319  | 54               | 55      | 57 | 4.66         | 0.035 | 2.72  |
|                            | male   | 0.483            | 0.452  | 51               | 52      | 54 | 2.99         | 0.090 | 1.07  |
| <b>Finger Tapping</b>      | female | 0.203            | 0.156  | 57               | 58      | 60 | 3.35         | 0.072 | 1.43  |
|                            | male   | 0.411            | 0.400  | 51               | 52      | 54 | 0.94         | 0.337 | -1.01 |
| <b>Navon GL</b>            | female | 0.423            | 0.368  | 55               | 56      | 58 | 5.16         | 0.020 | 3.20  |
|                            | male   | 0.282            | 0.272  | 46               | 47      | 49 | 0.70         | 0.417 | -1.29 |

67

68

69
